# Supplementary material for: FAK Drives Resistance to Therapy in HPV-Negative Head and Neck Cancer in a p53-Dependent Manner
Source: Oxford University Press journal article supplement (doi:10.1158/1078-0432.ccr-23-0964), 2023-10-11
Supplement: ccr-23-0964_supp_figure_2_suppfs2.pdf [file ccr-23-0964_supp_figure_2_suppfs2.pdf]

Supplementary Figure 2. FAK knockdown and p53 mutant expression. A) Western blots of the indicated proteins in HN31 cells. B) Western blots for the indicated proteins in UM-SCC-1 cells (p53 null/lo) expressing empty vector (EV), wild-type p53 (P53wt) or three TP53 mutations (R175H, G245C, and R282W).
